# Supplementary material for: Chemical Identification of Secondary Metabolites from Rhizospheric Actinomycetes Using LC-MS Analysis: In Silico Antifungal Evaluation and Growth-Promoting Effects
Source: MDPI journal article supplement (doi:10.3390/plants12091869), 2023-05-02
Supplement: s1 [file s1]

## Supplementary Material

# Chemical Identification of Secondary Metabolites from Rhizospheric Actinomycetes Using LC-MS Analysis: In Silico Antifungal Evaluation and Growth-Promoting Effects

Hazem S. Elshafie <sup>1</sup>, Laura De Martino <sup>2</sup>, Carmen Formisano <sup>3</sup>, Lucia Caputo <sup>2</sup>, Vincenzo De Feo <sup>2</sup> and Ippolito Camele <sup>1,\*</sup>

<sup>1</sup> School of Agricultural, Forestry, Food and Environmental Sciences, University of Basilicata, 85100 Potenza, Italy; hazem.elshafie@unibas.it

<sup>2</sup> Department of Pharmacy, University of Salerno, Via Giovanni Paolo II 132, 84084 Fisciano, Italy; ldemartino@unisa.it (L.D.M.); lcaputo@unisa.it (L.C.); defeo@unisa.it (V.D.F.)

<sup>3</sup> Department of Pharmacy, School of Medicine and Surgery, University of Naples Federico II, Via Montesano 49, 80131 Naples, Italy; carmen.formisano2@unina.it (C.F.)

\* Correspondence: ippolito.camele@unibas.it; Tel.: +39-0971-205544; Fax: +39-0971-205503 (I.C.)

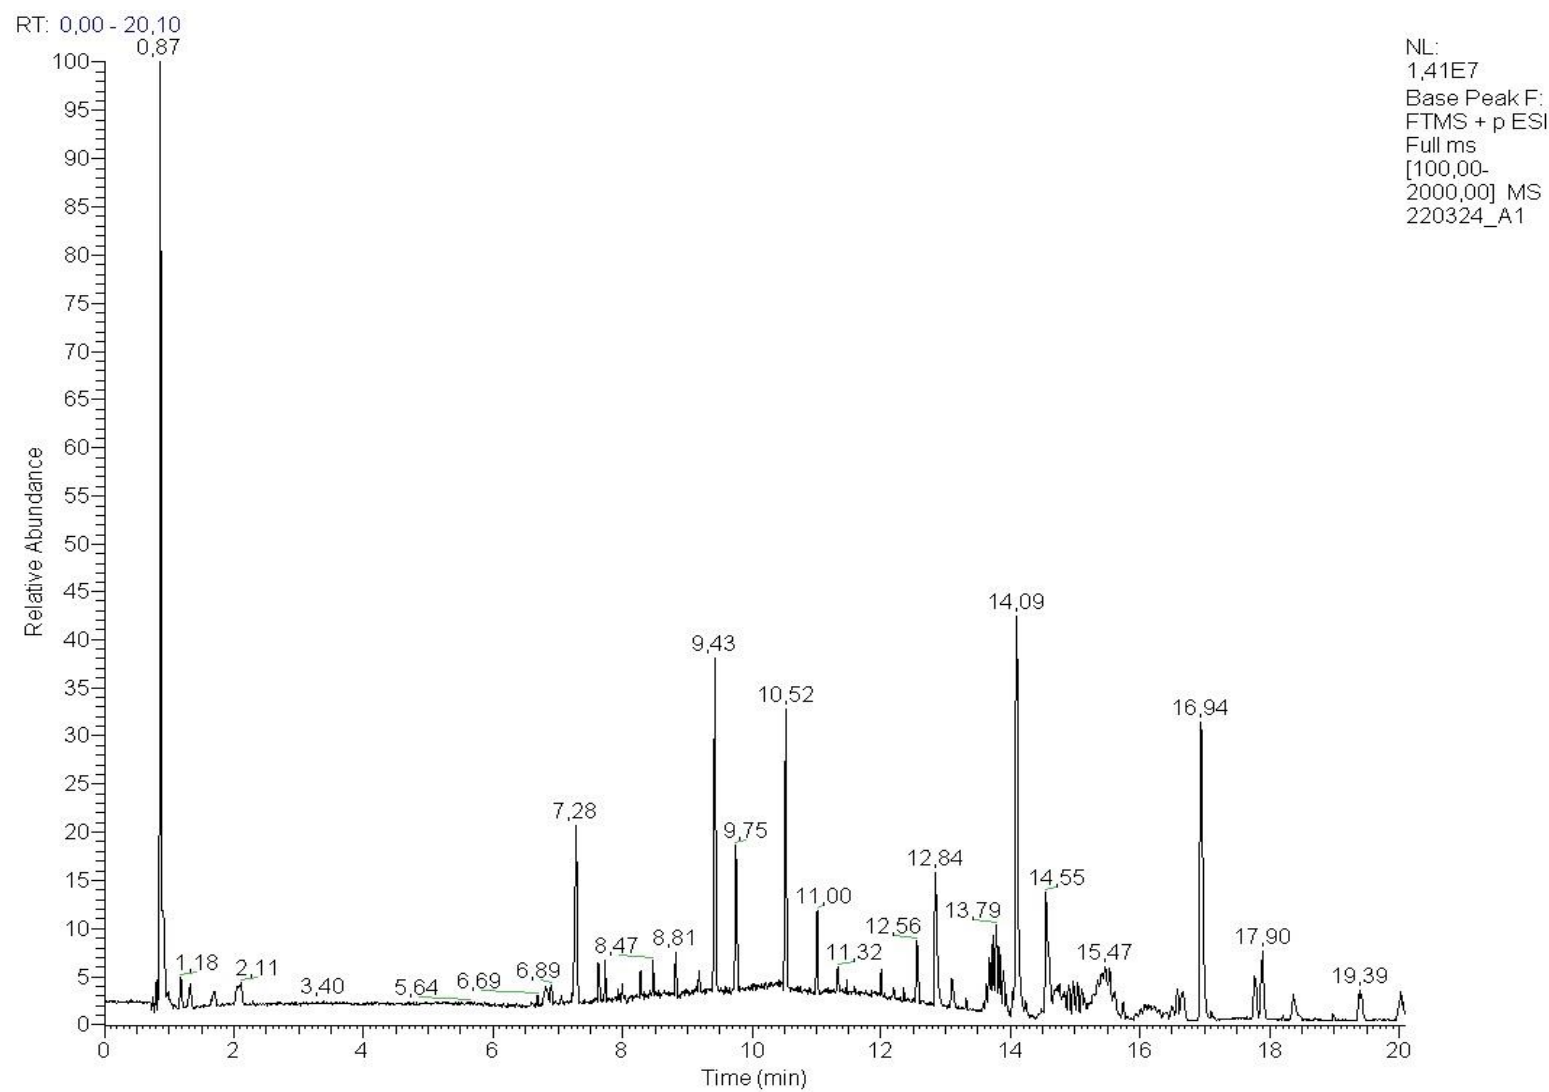

**Figure S1.** LC-MS chromatogram of the metabolites extracted from *Streptomyces* spp. (Act1).

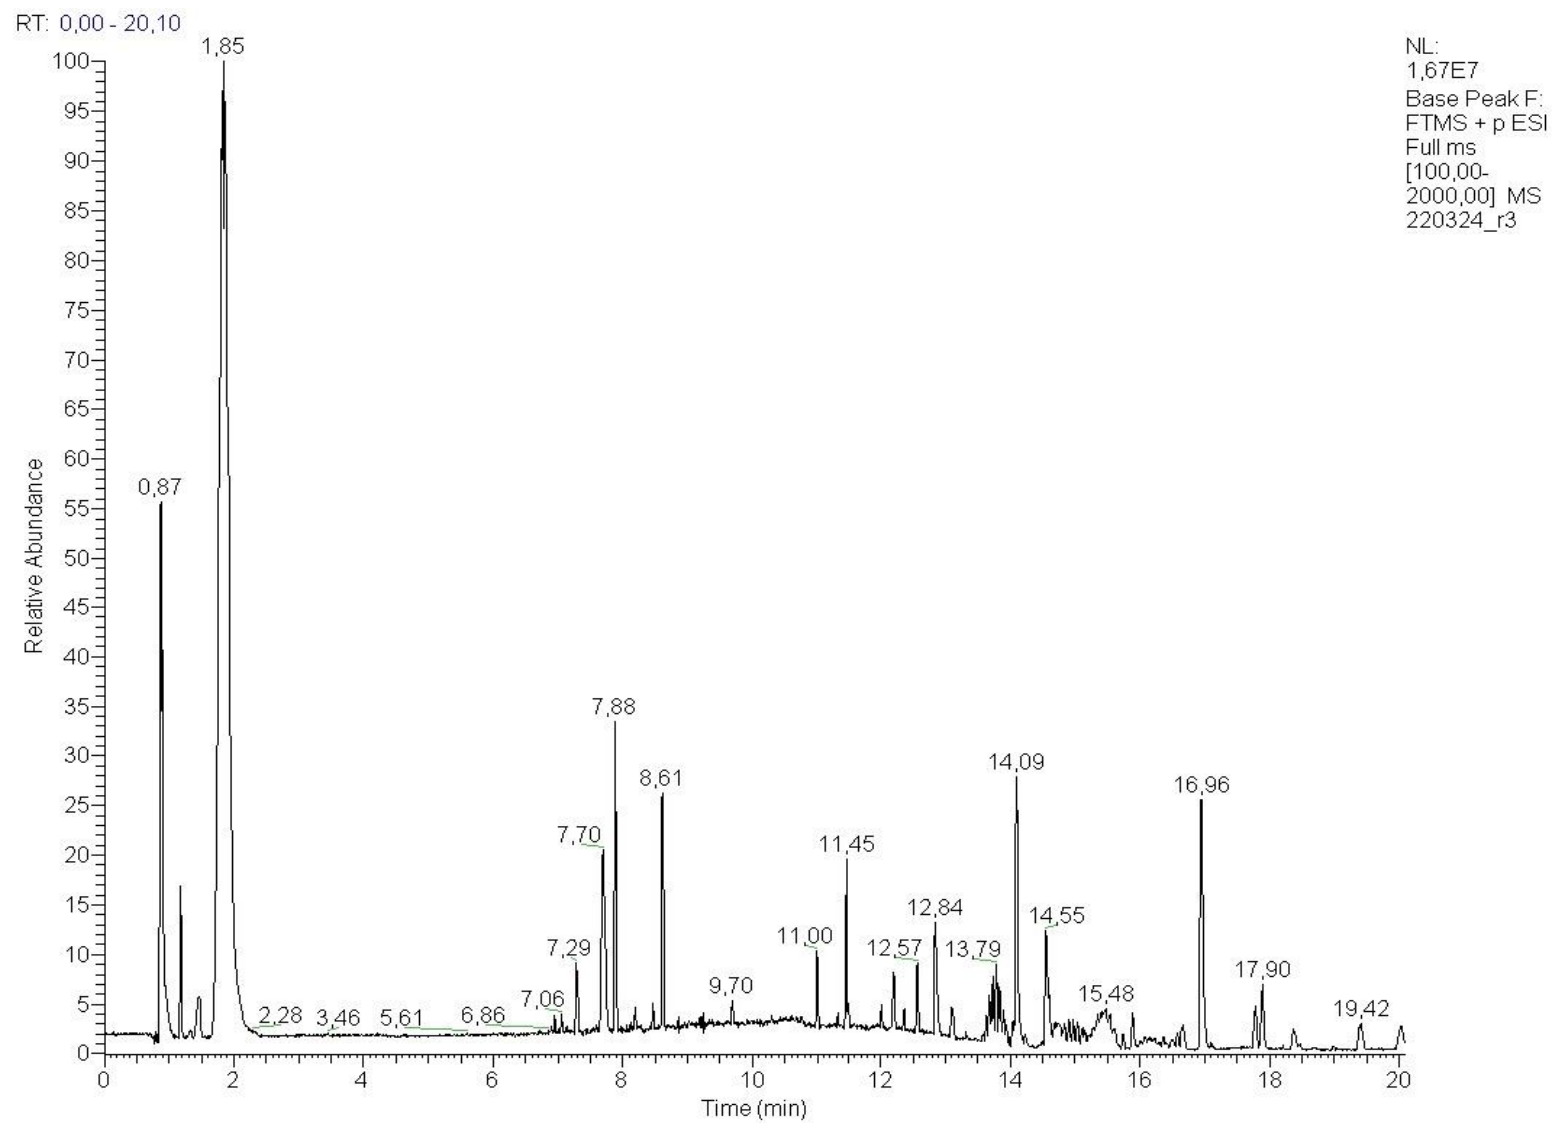

**Figure S2.** LC-MS chromatogram of the metabolites extracted from *S. atratus* (Act2).

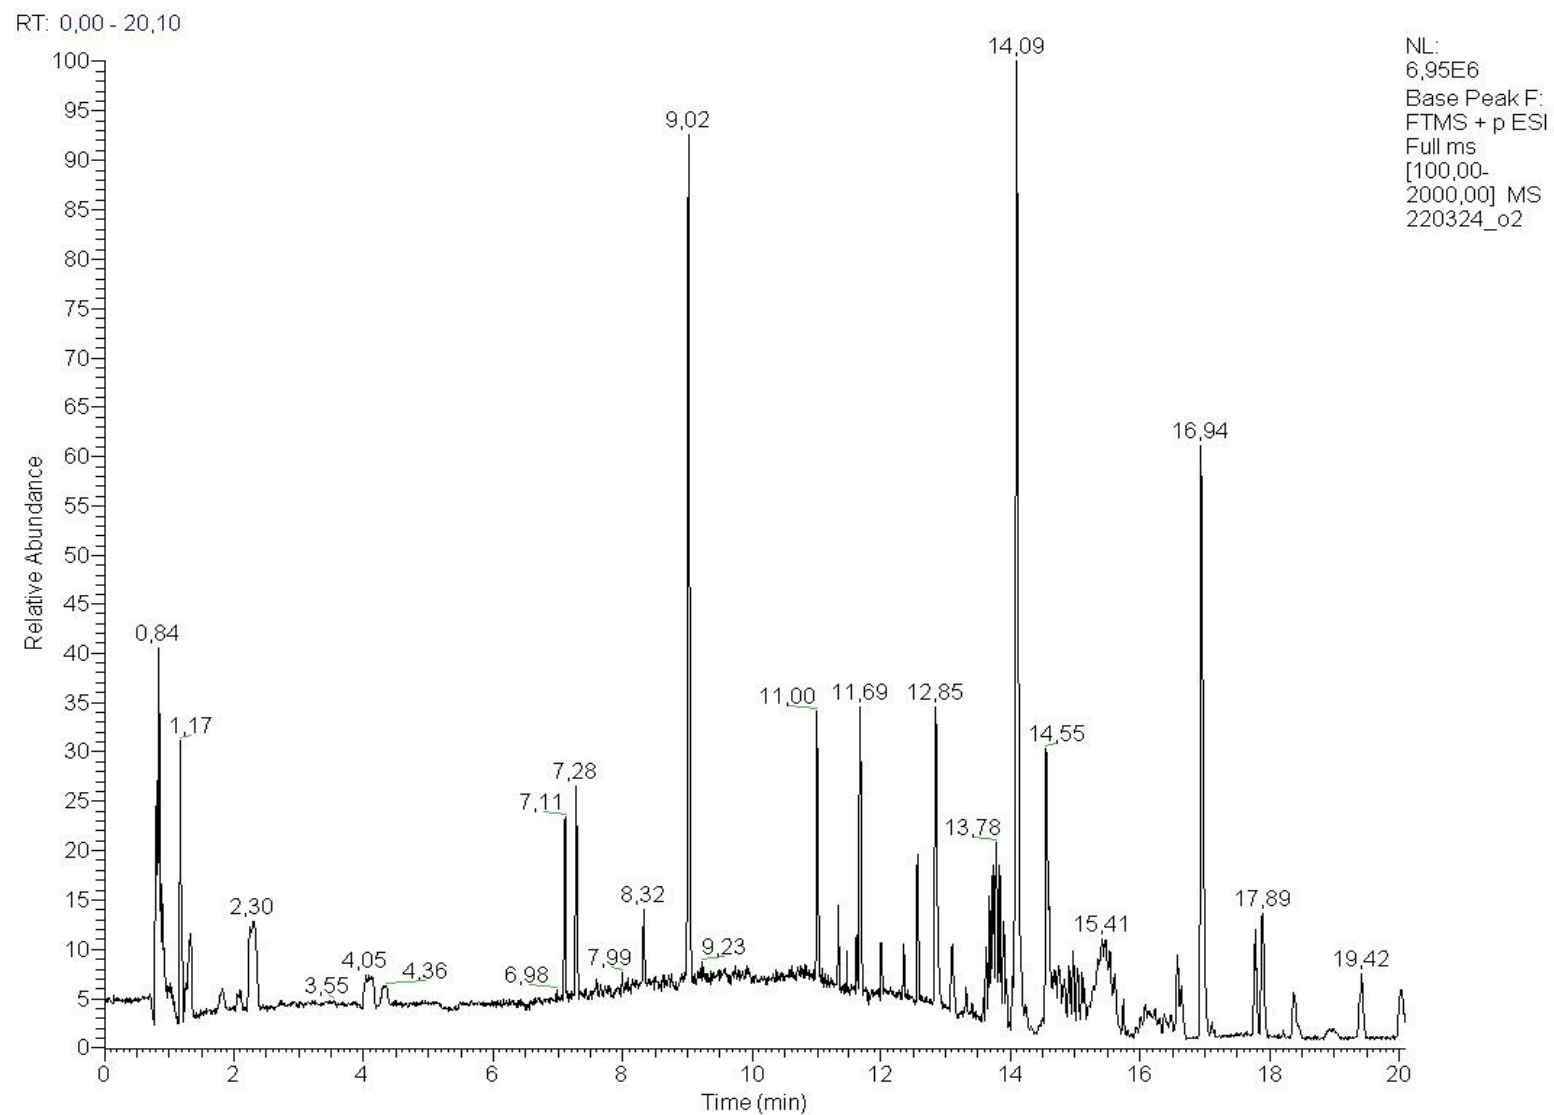

**Figure S3.** LC-MS chromatogram of the metabolites extracted from *A. humicola* (Act3).

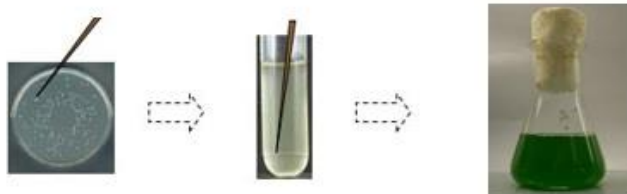

1

#### Preparation of the microbial broth Culture

**Original vegetative cells** cultured on agar media for 24 – 96 hrs. at 22° - 37° C

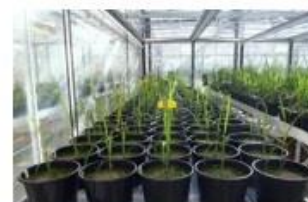

2

#### Microbial inoculation in rhizosphere zone or in plant tissues

4

#### Observation & Measurements :

**1- Ecophysiological:** NL, SL, TFwS, TDw

**2- Disease Index** using the following scale: 0= less than 5 % symptomatic leaf; 1= 6 to 20 % of symptomatic leaf; 2= 21 to 50 % of symptomatic leaf; 3= 51 to 80 % of symptomatic leaf; 4 ≥ 80 % of symptomatic leaf.

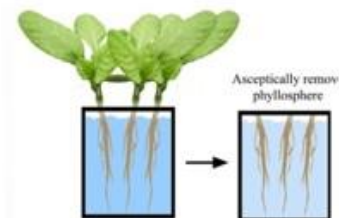

3

#### Application of microbial Suspension

**Figure S4.** Methodological procedures of in silico experiment in greenhouse.
